# Supplementary material for: Cultivating Fluorescent Flowers with Highly Luminescent Carbon Dots Fabricated by a Double Passivation Method
Source: Nanomaterials (Basel). 2017 Jul 7;7(7):176. doi: 10.3390/nano7070176 (PMC5535242; doi:10.3390/nano7070176)
Supplement: Supplementary file 1 [file nanomaterials-07-00176-s001.pdf]

# Supplementary Nanomaterials: Cultivating Fluorescent Flowers with Highly Luminescent Carbon Dots Fabricated by A Double Passivation Method

Shuai Han <sup>1,2</sup>, Tao Chang <sup>1</sup>, Haiping Zhao <sup>2</sup>, Huanhuan Du <sup>1</sup>, Shan Liu <sup>1</sup>, Baoshuang Wu <sup>1</sup> and Shenjun Qin <sup>2,\*</sup>

<sup>1</sup> College of Materials Science and Engineering, Hebei University of Engineering, Handan 056038, China; hansh04@163.com (S.H.); changt03@sina.com (T.C.); hebei123hh@sina.com (H.D.); ls10280924@sina.com (S.L.); hebeiwbs@163.com (B.W.)

<sup>2</sup> Key Laboratory of Resource Exploration Research of Hebei Province, Hebei University of Engineering, Handan 056038, China; hansh04@163.com (S.H.); zhaohaiping609@163.com

\* Correspondence: qinsj528@hebeu.edu.cn (S.Q.); Tel.: +86-0310-857-7902

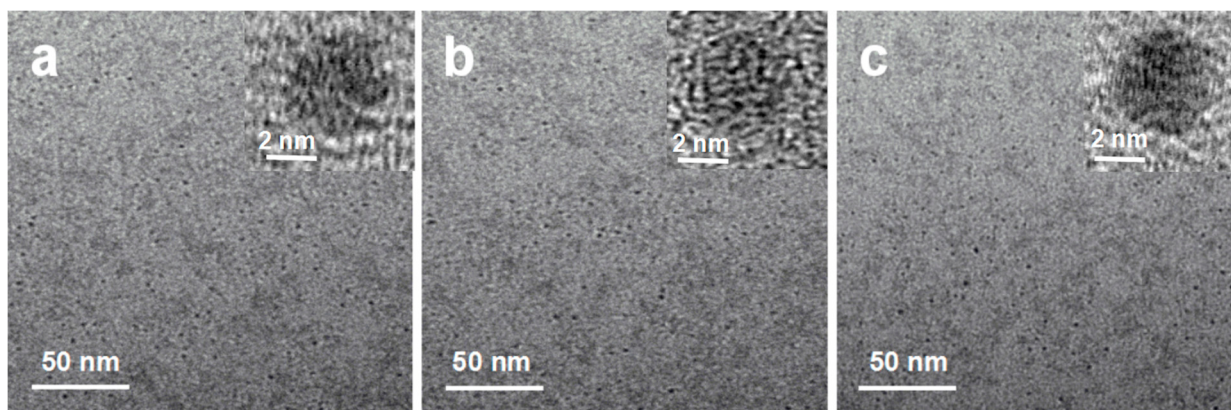

**Figure S1.** TEM images of ECD (a), Ca-1-CD (b), Ca-2-CD (c).

**Table S1.** The QY results of the three CD samples in aqueous solution.

|       | ECD  | Ca-1-CD | Ca-2-CD |
|-------|------|---------|---------|
| QY(%) | 73.1 | 81.3    | 86.1    |

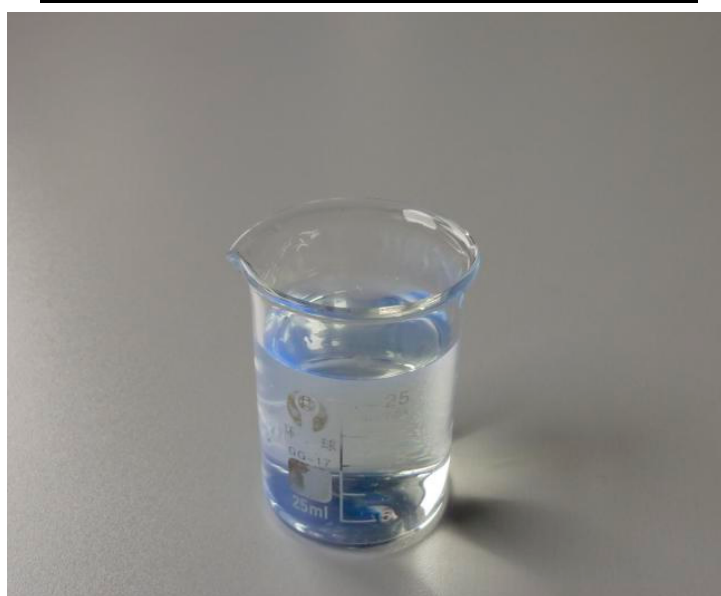

**Figure S2.** The Ca-2-CD aqueous solution under natural light irradiation ( $0.1 \mu\text{g}\cdot\text{mg}^{-1}$ ).

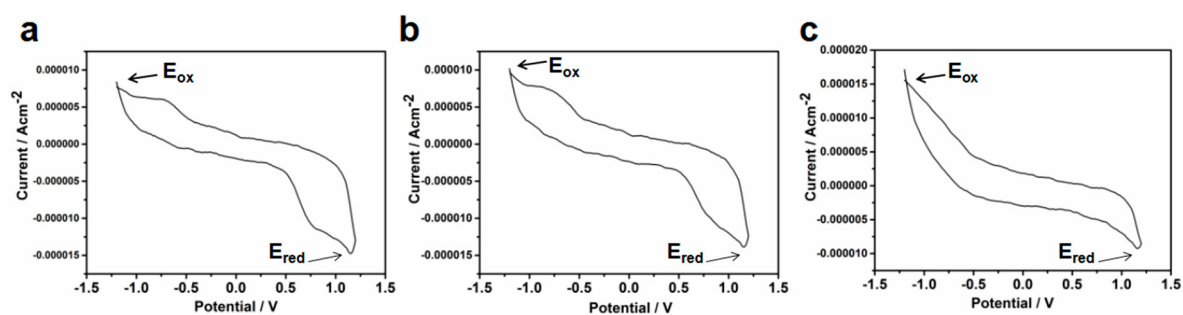

**Figure S3.** The cyclic voltammogram of the ECD (a), Ca-1-CD (b), Ca-2-CD (c) and 0.1 mol/L KCl aqueous solution (the scan rate: 30 mV/s).

**Data notes:**

To estimate their HOMO and LUMO energy levels, cyclic voltammetry (CV) was carried out by using a standard three-electrode system, which consisted of glassy carbon electrode as the working electrode, a platinum wire as the counter electrode, and calomel electrode as the reference electrode. CV was recorded in DI-water containing CMCD and 0.1 M KCl as the supporting electrolyte. The HOMO and LUMO energy levels in eV of CMCD were calculated according to the following equations:

$$E(\text{HOMO}) = -e(E_{\text{ox}} + 4.4) \text{ (eV)} \quad (1)$$

$$E(\text{LUMO}) = -e(E_{\text{red}} + 4.4) \text{ (eV)} \quad (2)$$

$$E_g = -e\Delta E \quad (3)$$

$$\Delta E = E_{\text{ox}} - E_{\text{red}} \quad (4)$$

where  $E_{\text{ox}}$  and  $E_{\text{red}}$  are the onset of oxidation and reduction potential, which are the potentials corresponding to the the maximum forward current and the backward current.  $E_g$  is the energy gap, respectively.<sup>[55]</sup>

Finally, we could calculate the energy gaps listed as below:

$$E_{\text{ECD}} = 3.57 \text{ eV}, E_{\text{Ca-1-CD}} = 3.60 \text{ eV}, E_{\text{Ca-2-CD}} = 3.62 \text{ eV}$$

where  $E_{\text{ECD}}$ ,  $E_{\text{Ca-1-CD}}$  and  $E_{\text{Ca-2-CD}}$  are the energy gaps of ECD, Ca-1-CD and Ca-2-CD, respectively.

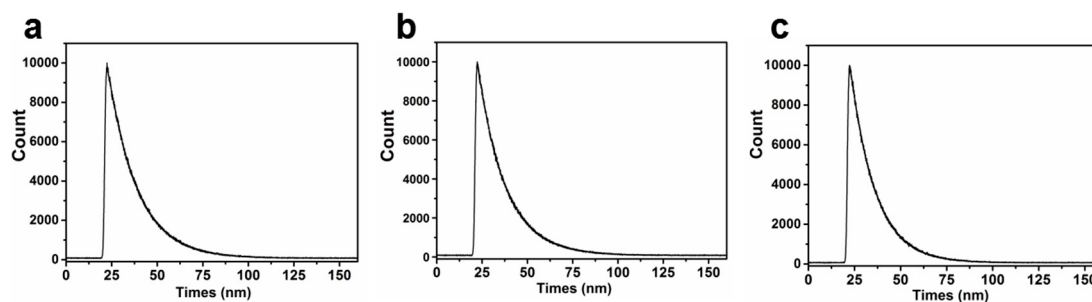

**Figure S4.** Luminescence decay curve of the three CD samples recorded at room temperature in aqueous solution (a. ECD , b. Ca-1-CD, c.Ca-2-CD).

**Data notes:**

The emission decay curve was monitored under the excitation wavelength at 360 nm, and two exponents were shown for the three curves (Table S2). The average lifetime  $\langle \tau \rangle$  is estimated by the following equation:

$$\langle \tau \rangle = \frac{\sum A_i \tau_i^2}{\sum A_i \tau_i}$$

where  $A_i$  is the preexponential factor related to the statistical weights of each exponential and  $\tau_i$  represent the lifetimes of each exponential decay. The lifetimes of the CD samples are shown below:

**Table S2.** The lifetimes ( $\tau$ ) and the average lifetimes ( $\langle \tau \rangle$ ) of the three CD samples.

| ECD | Ca-1-CD | Ca-2-CD |
|-----|---------|---------|
|-----|---------|---------|

|                      |                  |                  |                 |
|----------------------|------------------|------------------|-----------------|
| $\tau_1$             | 3.86 ns (1.6%)   | 3.41 ns (1.0%)   | 3.2 ns (1.1%)   |
| $\tau_2$             | 15.42 ns (98.4%) | 15.01 ns (99.0%) | 14.5 ns (98.9%) |
| $\langle\tau\rangle$ | 15.23 ns         | 14.89 ns         | 14.7 ns         |

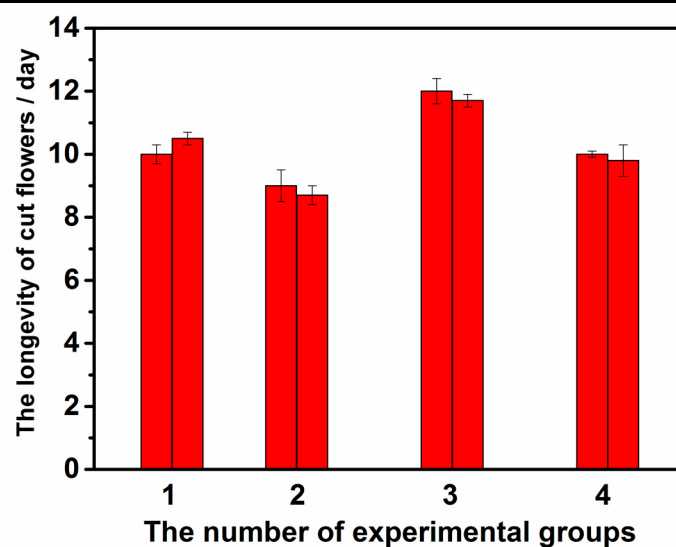

**Figure S5.** The results of the longevity-observing tests (left, the longevity of ordinary carnations; right, the longevity of fluorescent carnations).
